# Supplementary material for: A Temporal Perspective on the Interplay of Demography and Selection on Deleterious Variation in Humans
Source: Oxford University Press journal article supplement (doi:10.1534/g3.117.039651), 2017-02-04
Supplement: 039651_files1.pdf [file 039651_files1.pdf]

## Supplement

### OOA demography

In Figure 2 and 3, changes in the frequency spectrum were examined starting from equilibrium, the parameters for bottleneck sizes and growth rates in these examples were chosen to match those in the OOA demography from TENNESSEN *et al.* (2012) which contains a bottleneck period (between events  $b$  and  $c$ ) and a bottleneck+growth period (between events  $c$  and  $d$ ). We next ask how well these two periods, which we examined in isolation in Figures 2 and 3, describe phases of heterozygosity change in the full OOA demography. The full demography also contains other differences; the population size doubles before the split, and the OOA bottleneck lasts only about 1,000 generations before a second bottleneck and growth event occurs (Figure 1).

Figure S1 shows changes in expected heterozygosity during this period for a range of  $s$ . Qualitatively, the heterozygosity dynamics seen in the isolated periods of OOA demography (Figures 2 and 3) are also seen in numerical solutions over the full trajectory. Heterozygosity decreases following the first bottleneck and temporarily undershoots its equilibrium value when selection is strong. Heterozygosity again drops after the second bottleneck but rapidly begins to recover during the following exponential growth period. It is only for very strongly deleterious variation that we see the over- and undershooting behavior that appear in the isolated bottleneck and bottleneck plus growth models. The timescale of the OOA demography is not long enough for these behaviors to occur when selection is weaker. As is clear from the lower heterozygosity of non-African populations (YU *et al.*, 2002), the growth phase does not persist long enough for neutral variation to recover. However, heterozygosity at strongly selected sites is predicted to recover more quickly.

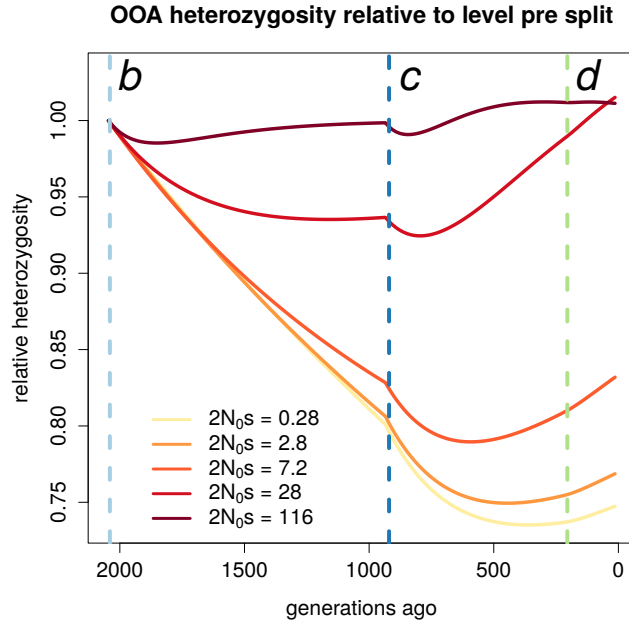

Figure S1: **The response of heterozygosity at sites under purifying selection to events following the OOA bottleneck.** The three vertical lines here correspond to events *b*, *c*, and *d* in Figure 1.  $N_0$  corresponds to the population size preceding event *b*. For the strongest selection coefficients heterozygosity can be seen to undershoot and begin to increase, but for most the decrease is monotonic following *b*. Following *c*, heterozygosity only overshoots its value at mutation-selection balance and begins to decrease when selection is strongest ( $2N_0s = 116$ ).

## 707 Evaluation of numerical precision

708 For the numerical analyses of equation 1 it was necessary to choose a grid of points on the  
 709 derived allele frequency  $x$  and a time step for  $t$ . Due to the highly peaked nature of the  
 710 frequency spectrum as one approaches zero it was more important to have a dense grid of  
 711 values at small  $x$  than at large  $x$  (EVANS *et al.*, 2007). Specifically, we required an algorithm  
 712 that generates a nonuniform grid on  $x$  such that the grid density doubles at any change-point  
 713 in density (EVANS *et al.*, 2007). The algorithm takes a maximum step size and number of  
 714 grid points after which the grid interval should double. We then search for an initial interval  
 715 size such that the final grid point is  $x = 1$ . The grid for all figures of the main text uses an  
 716 initial step size of  $x_0 = 1.564 \times 10^{-10}$ , a maximum step size of  $10^{-3}$ , and doubles after 80  
 717 iterations. This resulted in a grid with 2,525 points. The  $t$  interval used was  $5 \times 10^{-4}$  in  
 718 units of the effective population size. Lowering this time interval did not affect results.

719 We investigated the sensitivity of numerical solutions to the grid on  $x$  by starting with  
 720 the equilibrium solution to equation 1 and solving this forward in time to evaluate the  
 721 accumulation of numerical error. Figure S2 shows the percent error in the first four moments

722 of the frequency spectrum for different selection coefficients after the same amount of time  
 723 as in Figure 1. Error is greatest as one considers higher order moments of the frequency  
 724 spectrum, and is peaked at an intermediate value of  $s$ . Even though error is smaller for  
 725 the finer grid, the qualitative results in Figure 5 are unaffected (Figure S2). As  $P_N/P_T$   
 726 is influenced by higher moments of the frequency spectrum it may be more sensitive to  
 727 numerical error. Results in the main text that are dependent on only the first two moments  
 728 are also nearly identical.

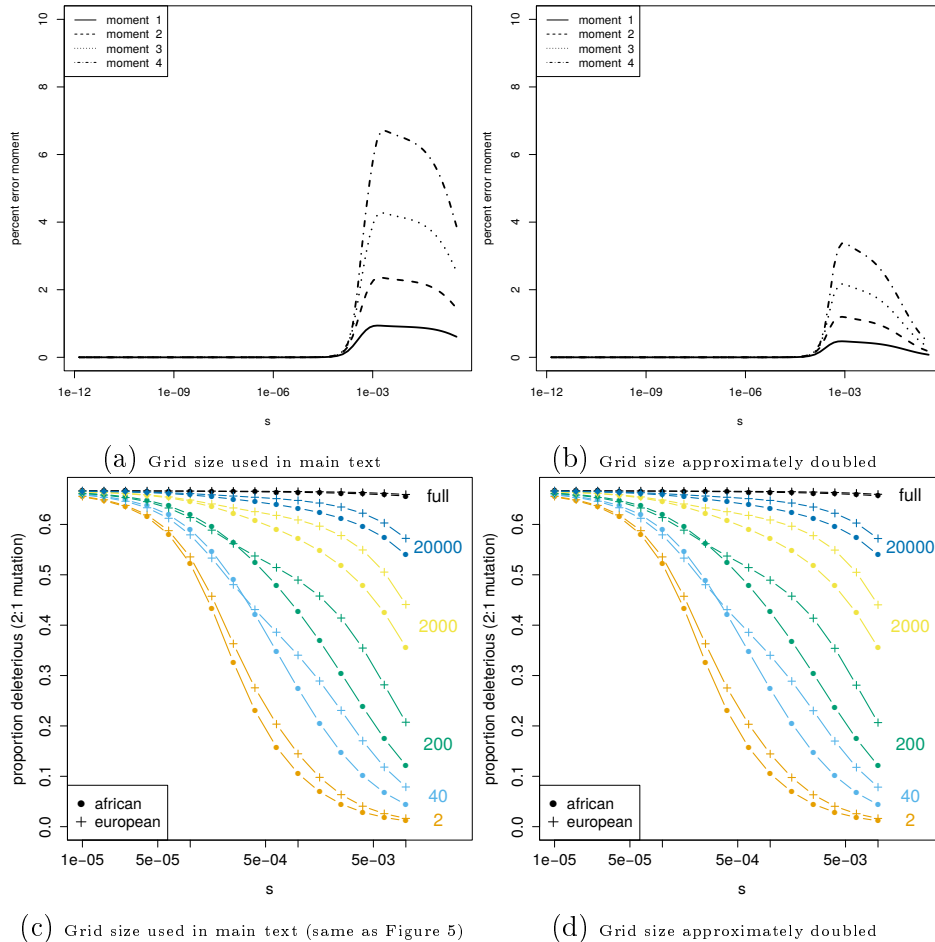

Figure S2: **Little effect of numerical errors.** Panels (a) and (b) show the accumulation of errors in the first four moments of the frequency spectrum after a time period equivalent to that in Figure 1, with the same initial population size, with (b) having about twice as many points as (a). Panels (c) and (d) show Figure 5 using the same grids as (a) and (b).

## 729 Comparison to Wright-Fisher model

730 We compare a few cases of diffusion results to a Wright-Fisher (WF) model in order to check  
 731 our numerical solutions. For the WF model we solve for the expected site frequency spectrum

732 using the Markov chain approach described by EVANS *et al.* (2007) with the standard Wright-  
733 Fisher transition matrix (EWENS, 2004). Figure S3 compares the evolution of heterozygosity  
734 shown in the middle line of Figure 2B (orange,  $2N_0s = 18.3$ ) to the expected heterozygosity  
735 in the WF model. The results show the same qualitative behavior and only small-scale  
736 error ( $< 0.1\%$  difference in relative heterozygosity). Figure S4 compares the evolution of  
737 heterozygosity shown in the middle line (orange,  $2N_0 = 5.9$ ) of Figure 3B to the expected  
738 heterozygosity in the WF model. It was necessary in this case to scale the population size  
739 down because the large size of the population after exponential growth makes the transition  
740 matrix very large. The models should have approximately the same behavior as long as the  
741 product of  $N$  and  $s$  is the same each generation and that time is rescaled. We again find  
742 very close agreement. We finally compare WF and diffusion results for  $P_N/P_T$  over the OOA  
743 trajectory for  $s = 6.31e - 4$ . Figure S5 shows that the agreement between the models is very  
744 good except when the sample size is very large ( $k = 20,000$ ). The period when agreement  
745 is poor occurs during the OOA bottleneck. At this time the effective size of the population  
746  $2N = 3,722$  is much less than the sample size, and this will create discordance between the  
747 diffusion and WF models.

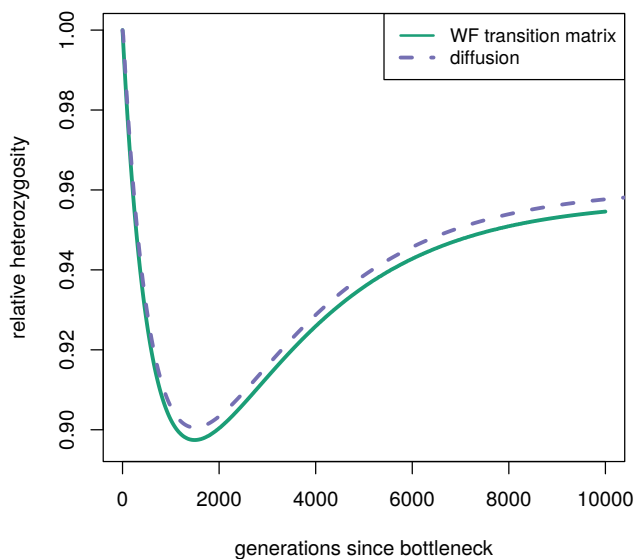

Figure S3: Comparison of WF model and diffusion in bottleneck heterozygosity.

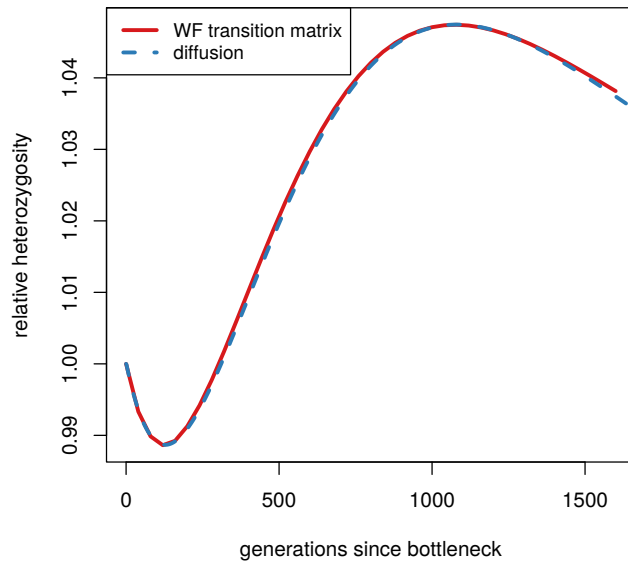

Figure S4: Comparison of WF model and diffusion in bottleneck+growth heterozygosity.

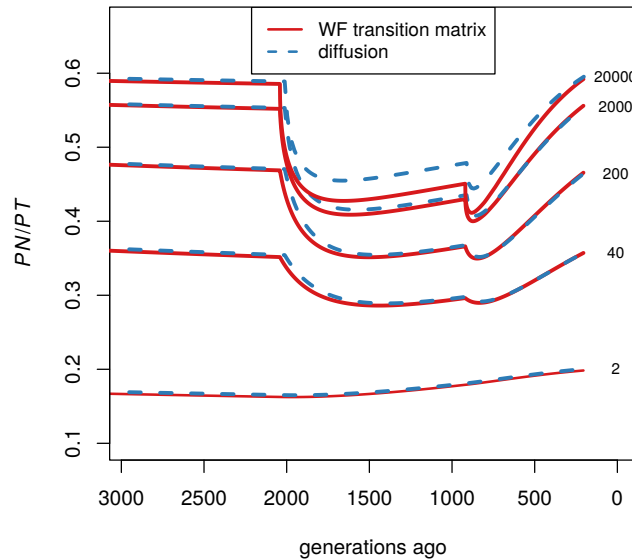

Figure S5: Comparison of WF model and diffusion in  $P_N/P_T$  over the OOA trajectory.

## 748 Sensitivity of derived allele count to quality filters

749 Substantial care was taken by the ExAC curators to provide high quality genotype calls  
 750 (LEK *et al.*, 2016). However, we find that the difference in the derived allele count between  
 751 AFR and NFE clusters in the ExAC data is sensitive to two quality measures. The first  
 752 of these is the tranche level which is calculated when recalibrating variant quality scores  
 753 against a training set of known variants. A tranche level of 99.6% means that variants are  
 754 chosen with a log-odds of being a true variant threshold such that there is 99.6% sensitivity

755 of true variants in the training set (DEPRISTO *et al.*, 2011). Thus, choosing a higher tranche  
 756 level means a greater number of both false positives and true variants. The second filter  
 757 was applied after the tranche level had been chosen. For this we removed sites that did not  
 758 successfully genotype in a certain fraction of individuals in both the African and European  
 759 clusters. For both filters increasing stringency tended to decrease the excess number of  
 760 derived alleles in the African cluster, and whether there is an excess of derived alleles in  
 761 the African versus European cluster depends on the combination used (Figure S6). For the  
 762 analysis in the main text we use a tranche level of 99.6% and cutoff of 80%.

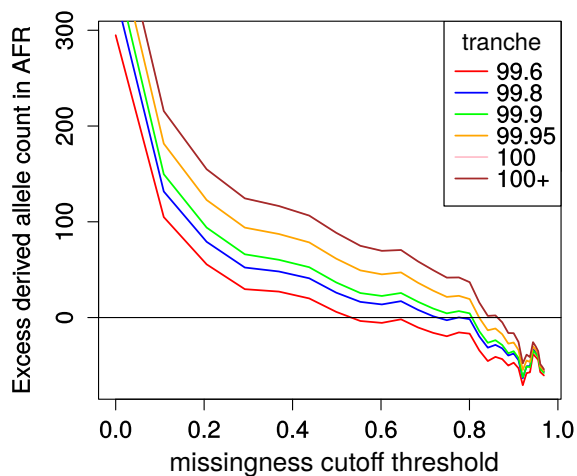

Figure S6: **The dependence of the derived allele count on sequence quality filters.** The effects of removing sites according to two quality filters on the difference in derived allele count between African and European samples. The overall difference shrinks as expected as we remove sites from consideration, and for very loose criteria on missingness (i.e. removing sites where the fraction of samples with no genotype is less than 0.8) the sign of the difference changes.

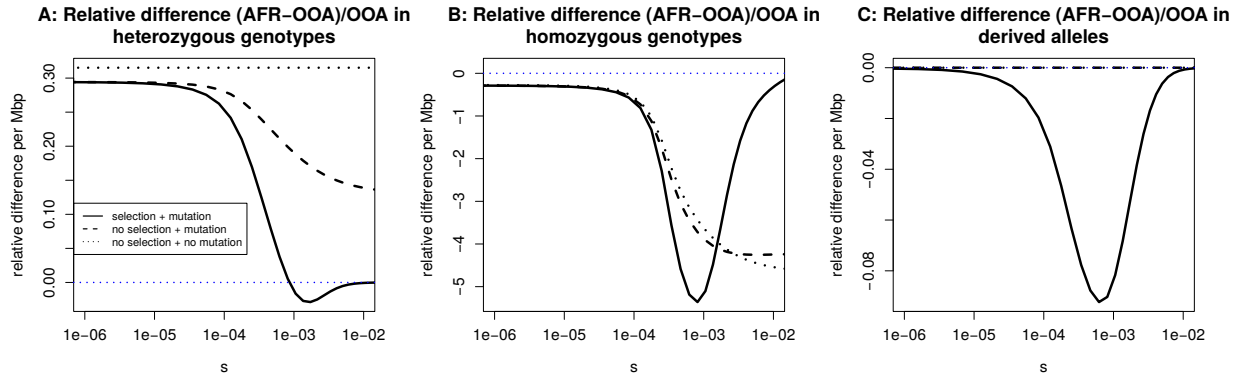

Figure S7: **Stratification of expected differences by selection coefficient, relative to value in the OOA trajectory.** The same situation as in Figure 6 but differences are given relative to the OOA value. We show, for a range of selection coefficients, the expected difference per Mbp between the OOA and African model, relative to the OOA value, in (A) heterozygous genotypes, (B) homozygous genotypes, and (C) derived alleles. The vertical axis gives the expected difference per Mbp per diploid genome. For derived allele count and derived allele homozygosity this includes fixations since the start of the population histories shown in Figure 1. *No selection + mutation* refers to numerical solutions setting  $s = 0$  following the OOA bottleneck in the European trajectory. *No selection + no mutation* refers to the same, but turning off new mutations as well.

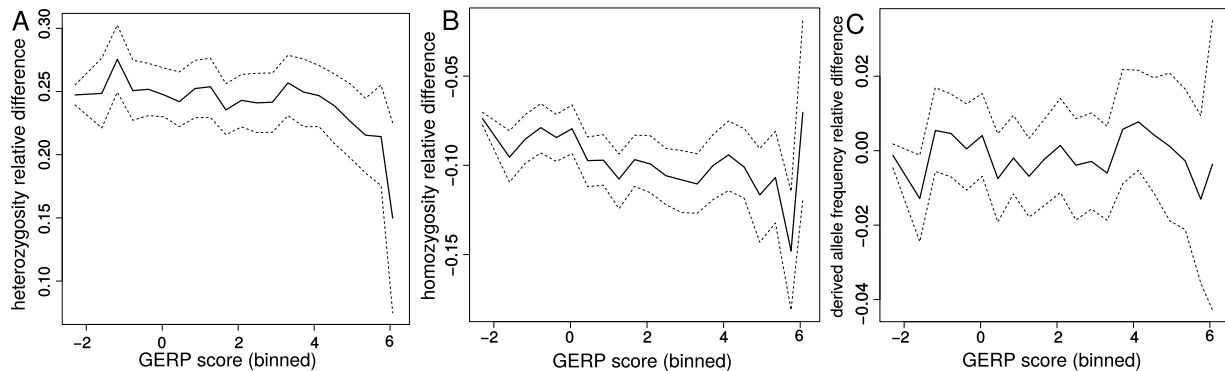

Figure S8: **Relative differences  $((AFR - NFE)/NFE)$  in heterozygosity, homozygosity, and derived allele frequency stratified by GERP score.** The same situation as in the bottom row of Figure 9 but differences are given relative to the NFE value. Relative Heterozygosity (A), homozygosity (B), and derived allele frequency (C) differences for the African and non-Finnish European population groups in ExAC plotted against binned GERP scores. Dotted lines provide 95% confidence intervals obtained by bootstrapping across sites within each bin.

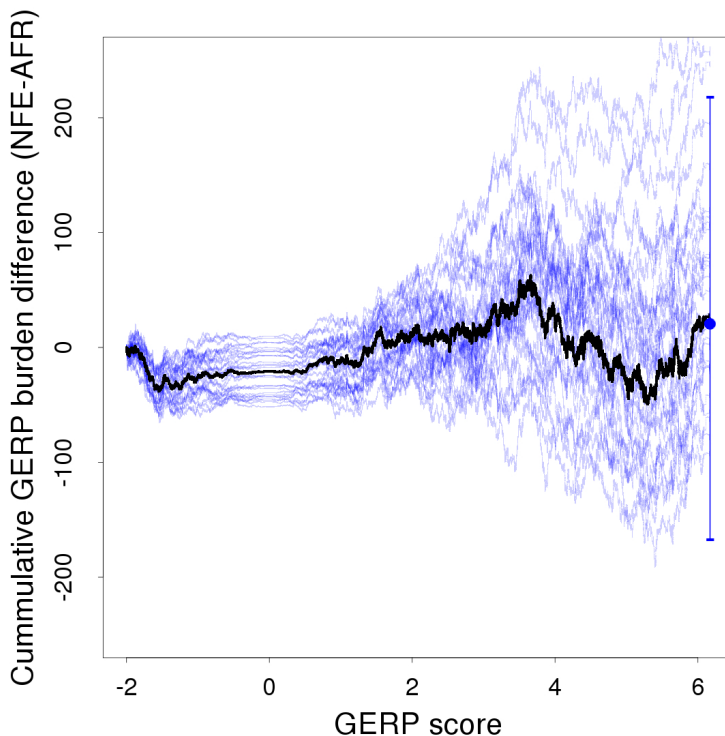

Figure S9: **Cumulative difference in GERP score burden.** The cumulative difference in the GERP score burden starting with  $-2$ . Blue lines show thirty samples bootstrapped across sites. The final blue point and bars show the mean difference in GERP burden and 95% confidence interval from 200 bootstrap replicates.

764 **Approximating the expectation of  $P_N/P_T$**

765 Since the simplest prediction of deleteriousness is whether a mutation is synonymous or  
 766 nonsynonymous, we write the proportion of variants that are deleterious as

$$E[P_N/P_T] \approx \frac{E[P_N^k]}{E[P_N^k] + E[P_S^k]}. \quad (5)$$

767  $P_N^k$  and  $P_S^k$  are the expected total numbers of variants in a sample of size  $k$  that are nonsyn-  
 768 onymous and synonymous respectively, and  $P_T$  is their sum. These correspond to polymor-  
 769 phism counts such as those used in a McDonald-Kreitman test MCDONALD and KREITMAN  
 770 (1991). Superscripts are dropped when considering all variants in the population. These  
 771 quantities can be computed for a given site frequency spectrum as

$$P^k(t) = \int_0^1 (1 - x^k - (1 - x)^k) f(x, t) dx \quad (6)$$



772 or

$$P(t) = \int_{\frac{1}{2N}}^1 f(x, t) dx \quad (7)$$

773 (EWENS, 2004) depending on whether we consider a sample of size  $k$  or the entire population.

774 We want to be able to calculate the expectation of  $P_N/P_T$ , where

$$E[P_N/P_T] = E \left[ \frac{P_N}{P_N + P_S} \right]. \quad (8)$$

775 One difficulty in calculating this value is that the random variables in the numerator and

776 the denominator can both be zero. We first make the approximation that

$$E \left[ \frac{P_N}{P_N + P_S} \right] \approx E \left[ \frac{P_N}{P_N + P_S + 1} \right]. \quad (9)$$

Under the Poisson random field model  $P_N$  and  $P_S$  are both Poisson distributed. Writing their means as  $\lambda_N$  and  $\lambda_S$ , we can calculate

$$\begin{aligned} E \left[ \frac{P_N}{P_N + P_S + 1} \right] &= \frac{\lambda_N [e^{-\lambda_N - \lambda_S} + \lambda_N + \lambda_S + 1]}{(\lambda_N + \lambda_S)^2} \\ &\approx \frac{E[P_N]}{E[P_S] + E[P_N]}. \end{aligned} \quad (10)$$

777 The final approximation works as long as  $P_T$  is large because  $e^{-\lambda_N - \lambda_S}$  will be large. Since

778 this includes neutral alleles as well as deleterious ones, the approximation should work even

779 when selection is strong.

## 780 **Equilibrium properties of $P_N/P_T$**

781 Knowing that  $E[P_N/P_T] \approx \frac{E[P_N]}{E[P_N] + E[P_S]}$  is a good approximation we can now ask how the

782 forces of mutation, selection, and drift affect this value. These forces will cancel out at

783 equilibrium, but they can still be separated out within the diffusion equation. Dropping the

784 expectation notation and applying the chain rule we can write

$$\frac{d}{dt} \left( \frac{P_N}{P_T} \right) = \frac{P_N}{P_N + P_S} \left( \frac{P'_N}{P_N} - \frac{P'_N + P'_S}{P_N + P_S} \right). \quad (11)$$

Since we are assuming that only nonsynonymous mutations are selected against only the  $P'_N$  terms are affected by selection. If  $f_N(x, t)$  is the frequency spectrum at nonsynonymous sites, then we can write

$$\begin{aligned} P'_N &= \frac{d}{dt} \int_{\frac{1}{2N}}^1 f_N(x, t) dx \\ &= \int_{\frac{1}{2N}}^1 \left( \frac{d}{dx} [Sx(1-x)f_N(x, t)] + \frac{1}{2} \frac{d^2}{dx^2} [x(1-x)f_N(x, t)] \right) dx \end{aligned}$$

785 The left term of this gives the instantaneous change due to selection which we write as  $(P'_N)_\gamma$ .  
 786 The notation  $( )_\gamma$  is used to indicate the portion of a rate that is due to selection. This rate  
 787 is negative and is balanced out by drift and selection at equilibrium.

$$(P'_N)_\gamma = \int_{\frac{1}{2N}}^1 \frac{\partial}{\partial x} [Sx(1-x)f_N(x, t)] dx. \quad (12)$$

788 Substituting the equilibrium equation for the frequency spectrum,

$$f_N(x) = \theta_N \frac{e^{-2S}(1 - e^{2S(1-x)})}{(e^{-2S} - 1)x(1-x)}, \quad (13)$$

789 this integral evaluates to

$$(P'_N)_\gamma = -S\theta_N \frac{e^{-2S} - e^{-S/N}}{e^{-2S} - 1} \approx -S\theta_N \quad (14)$$

if selection is not too strong, and where  $\theta_N$  is the population-scaled mutation rate to non-synonymous alleles. We can then calculate the equilibrium change in  $P_N/P_T$  that is due to selection by only taking the  $P'_N$  terms in equation 11 and only considering the change in  $P_N$  that is due to selection  $\left( (P'_N)_\gamma \right)$ . The equilibrium decrease in  $P_N/P_T$  that is due to selection can then be written as

$$\begin{aligned} \frac{d}{dt} \left( \frac{P_N}{P_T} \right)_\gamma &= -S\theta_N \left( \frac{1}{P_S + P_N} - \frac{P_N}{(P_S + P_N)^2} \right) \\ &= -S\theta_N \left( \frac{P_S}{(P_S + P_N)^2} \right) \end{aligned} \quad (15)$$

790 This rate does not depend on  $\theta$ , and we can show this by writing

$$\theta = \theta_N + \theta_S = \pi\theta + (1 - \pi)\theta, \quad (16)$$

791 where  $\pi$  is the proportion of mutations that are nonsynonymous, and  $\theta_S$  is the population-  
 792 scaled mutation rate to synonymous alleles. If  $P_S := \theta_S F_S$  and  $P_N := \theta_N F_N$ , we can see that  
 793 the rate does not depend on the population mutation rate  $\theta$  by making substitutions into  
 794 equation 15.

$$\frac{d}{dt} \left( \frac{P_N}{P_T} \right)_\gamma = -S \left( \frac{\pi(1 - \pi)F_S}{(\pi F_N + (1 - \pi)F_S)^2} \right). \quad (17)$$

795 Although the  $F$  are the same as the  $P$  but with  $\theta = 1$ . When comparing this value between  
 796 different population sizes, it is important to note that this is a rate per  $2N$  generations, so  
 797 we need to scale to generations when comparing rates.

### 798 **The rate for a sample of size $k$**

When considering the rate of change due to selection of  $P_N/P_T$  in a sample of size  $k$ , the same basic equation applies, except that we have

$$\begin{aligned} \frac{d}{dt} \left( \frac{P_N}{P_T} \right)_\gamma^k &= (P'_N)_\gamma^k \left( \frac{1}{P_S^k + P_N^k} - \frac{P_N^k}{(P_S^k + P_N^k)^2} \right) \\ &= -\theta_N \int_0^1 (1 - x^k - (1 - x)^k) \frac{2S^2 e^{-2Sx}}{1 - e^{-2S}} dx \left( \frac{P_S^k}{(P_N^k + P_S^k)^2} \right) \\ &= -\int_0^1 (1 - x^k - (1 - x)^k) \frac{2S^2 e^{-2Sx}}{1 - e^{-2S}} dx \left( \frac{\pi(1 - \pi)F_S^k}{(\pi F_N^k + (1 - \pi)F_S^k)^2} \right). \end{aligned} \quad (18)$$

799 This is solved by numerical integration.
